# Supplementary material for: Cardiac metabolomic profile of the naked mole-rat—glycogen to the rescue
Source: Biol Lett. 2019 Nov 27;15(11):20190710. doi: 10.1098/rsbl.2019.0710 (PMC6892520; doi:10.1098/rsbl.2019.0710)
Supplement: Metabolomics Data Deposition [file rsbl20190710supp2.xlsx]

## Sheet: Sheet1
Figure 2B-E
Concentration normalised to tissue mass (mol per G w/w)						Naked mole rat	Naked mole rat	Naked mole rat	Naked mole rat	Naked mole rat	C57BL6	C57BL6	C57BL6	C57BL6	C57BL6
NAD	1	8.872	8.828	1		1.13222e-07	3.50678e-07	1.39553e-07	1.38344e-07	1.9613e-07	3.08788e-07	3.72805e-07	3.04878e-07	3.1222e-07	3.33678e-07
Nicotinamide	2	8.735	8.702	1		1.96691e-07	2.26205e-07	1.38801e-07	7.94239e-08	1.44482e-07	2.23413e-08	3.26264e-08	3.8021e-08	2.96404e-08	1.46217e-08
AMP	3	8.627	8.601	1		1.35867e-06	3.40624e-06	1.35829e-06	1.03316e-06	2.26174e-06	9.84345e-07	7.64524e-07	6.46989e-07	9.07542e-07	6.70677e-07
ATP	4	8.554	8.528	1		2.7068e-07	5.10657e-07	2.79482e-07	2.17121e-07	3.48714e-07	4.31798e-07	3.3518e-07	3.35563e-07	2.78809e-07	2.83522e-07
NADH	5	8.495	8.475	1		7.68858e-08	1.36042e-07	7.29738e-08	6.23737e-08	1.27265e-07	1.17824e-07	1.02202e-07	5.22987e-08	9.16445e-08	9.92646e-08
Formate	6	8.47	8.45	1		2.84636e-07	5.15445e-07	4.28439e-07	2.89638e-07	4.1049e-07	1.53463e-07	9.82844e-08	1.34494e-07	1.1741e-07	8.96527e-08
ATP + ADP	7	8.292	8.264	1		1.19515e-06	2.64265e-06	1.2556e-06	9.83519e-07	1.87792e-06	1.89581e-06	1.5787e-06	1.3279e-06	1.6296e-06	1.47557e-06
Tyrosine	8	7.218	7.175	1		1.10063e-07	2.3179e-07	1.27516e-07	8.33088e-08	8.27056e-08	2.06258e-07	2.83843e-07	2.06434e-07	1.48516e-07	2.66337e-07
Fumarate	9	6.53	6.507	2		1.65884e-08	1.05124e-07	4.19411e-08	2.2338e-08	4.64164e-08	3.2581e-08	5.12362e-08	3.60884e-08	1.76481e-08	2.30977e-08
G1P	10	5.482	5.443	1		5.60845e-07	1.16893e-07	2.92271e-07	5.31795e-07	6.79536e-07	2.91234e-08	2.56688e-09	1.18323e-08	1.22542e-08	6.23317e-09
glycogen	11	5.425	5.377	1		1.9835e-06	9.49503e-07	7.21839e-07	1.09229e-06	9.92805e-07	2.56658e-08	2.36423e-08	8.20371e-09	1.18352e-08	8.38856e-09
a-glucose	12	5.253	5.221	1		1.15671e-06	1.04286e-06	8.34685e-07	5.15392e-07	5.76239e-07	3.97222e-07	1.138e-06	6.36103e-07	2.82998e-07	5.23819e-07
myo-inositol	13	4.079	4.055	1		1.08404e-06	2.79226e-06	1.17999e-06	8.1021e-07	1.24058e-06	9.27295e-07	8.52406e-07	7.31077e-07	6.34599e-07	6.58735e-07
AMP	14	4.027	3.996	1		5.06393e-06	9.58041e-06	4.64287e-06	3.37638e-06	6.73359e-06	2.88189e-06	2.32647e-06	1.97481e-06	2.67466e-06	1.91102e-06
Creatine	15	3.949	3.917	2		1.09893e-05	2.24733e-05	1.12278e-05	7.00474e-06	1.1281e-05	6.88303e-06	7.98076e-06	5.68178e-06	6.20883e-06	6.61901e-06
Glycine	16	3.565	3.557	2		6.89866e-07	1.23475e-06	7.3839e-07	5.5014e-07	8.59801e-07	7.07273e-07	6.91233e-07	4.67572e-07	3.68149e-07	6.50929e-07
Taurine	17	3.437	3.395	2		2.14294e-05	5.04902e-05	2.2437e-05	1.57587e-05	2.65212e-05	2.0805e-05	1.68686e-05	1.67824e-05	1.75428e-05	1.90884e-05
Choline	18	3.217	3.209	9		7.26436e-08	7.85047e-08	5.64649e-08	2.45322e-08	2.65183e-08	5.56463e-08	6.93207e-08	3.58299e-08	4.32213e-08	6.01051e-08
Acetyl carnitine	19	3.209	3.194	9		1.57692e-07	5.46784e-07	2.11775e-07	8.09347e-08	1.35705e-07	1.5135e-07	1.79832e-07	1.05439e-07	1.17747e-07	2.1128e-07
Creatine	20	3.055	3.031	3		8.66431e-06	1.95112e-05	9.34228e-06	5.40788e-06	9.21115e-06	7.01967e-06	8.25981e-06	5.58936e-06	6.33946e-06	6.73209e-06
Glutathione	21	3.026	2.895	2		2.17611e-06	4.28832e-06	2.15593e-06	2.00006e-06	2.27879e-06	1.21999e-06	1.11372e-06	8.27037e-07	7.84738e-07	1.01196e-06
Aspartate	22	2.839	2.79	1		1.14723e-06	2.26405e-06	1.36017e-06	7.98772e-07	1.0718e-06	1.72719e-06	1.11011e-06	1.33153e-06	1.27454e-06	2.05357e-06
Glutamine	23	2.489	2.415	2		4.66963e-06	1.05738e-05	4.9389e-06	3.2553e-06	4.77093e-06	3.73332e-06	4.34073e-06	3.07012e-06	3.38959e-06	4.98531e-06
Succinate	24	2.411	2.396	4		6.062e-07	1.28991e-06	5.86894e-07	3.7176e-07	7.44772e-07	9.4804e-07	1.38052e-06	8.22501e-07	9.23671e-07	1.00402e-06
Glutamate	25	2.377	2.33	2		3.4858e-06	6.51168e-06	3.6643e-06	2.26585e-06	3.64546e-06	2.03e-06	2.21028e-06	1.65222e-06	1.79361e-06	1.96415e-06
Acetate	26	1.928	1.906	3		5.82875e-07	8.3035e-07	8.7531e-07	4.85321e-07	7.41087e-07	3.92523e-07	3.85144e-07	3.45266e-07	2.44734e-07	2.92939e-07
Alanine	27	1.498	1.468	3		1.36534e-06	3.38457e-06	1.40882e-06	7.96038e-07	1.46811e-06	1.65285e-06	2.01293e-06	1.34365e-06	1.32568e-06	1.65121e-06
Lactate	28	1.351	1.314	3		2.38206e-05	5.45067e-05	2.77594e-05	1.88207e-05	2.30132e-05	9.79509e-06	1.79472e-05	1.01649e-05	7.98759e-06	1.2886e-05
Valine	29	1.058	1.035	6		1.23667e-07	2.31857e-07	1.24507e-07	8.62584e-08	1.34467e-07	8.62621e-08	1.08169e-07	8.73879e-08	7.08019e-08	9.70801e-08
Isoleucine	30	1.028	1.003	3		1.49471e-07	4.00547e-07	2.25818e-07	1.65107e-07	2.6387e-07	1.22256e-07	1.22872e-07	1.19401e-07	9.38439e-08	1.00371e-07
Leucine	31	0.981	0.949	6		1.60969e-07	3.91171e-07	1.99612e-07	1.32445e-07	1.83865e-07	1.66983e-07	1.96377e-07	1.63732e-07	1.41604e-07	1.79985e-07
NAD/NADH						1.4726	2.57771	1.91237	2.21799	1.54111	2.62077	3.64772	5.82956	3.40686	3.3615
ATP/AMP						0.199225	0.149918	0.20576	0.210152	0.154179	0.438665	0.438417	0.518654	0.307213	0.42274
Succ/Fum						36.5437	12.2704	13.9933	16.6425	16.0455	29.098	26.9443	22.7913	52.3383	43.4685
Figure 2D
	ln(NMR/C57BL6)	-log10(P)
NAD	-0.55	1.83448
Nicotinamide	1.74	3.00282
AMP	0.86	1.42596
ATP	-0.02	0.0466834
NADH	0.03	0.0464432
ATP + ADP	0.01	0.01015
Tyrosine	-0.56	1.49991
Fumarate	0.37	0.380523
a-glucose	0.33	0.567219
myo-inositol	0.63	1.00075
AMP	0.92	1.92856
Creatine	0.63	1.26594
Glycine	0.34	0.93937
Taurine	0.41	0.761997
Choline	-0.02	0.0296493
Acetyl carnitine	0.39	0.384228
Creatine	0.43	0.766061
Aspartate	-0.12	0.229969
Glutamine	0.37	0.65221
Succinate	-0.34	0.846783
Glutamate	0.71	1.64202
Acetate	0.75	2.80732
Alanine	0.05	0.06854
Lactate	0.92	1.56235
Valine	0.44	1.09268
Isoleucine	0.77	1.6685
Leucine	0.23	0.426024
NAD/NADH	-0.66	1.86709
ATP/AMP	-0.84	3.78657
Succ/Fum	-0.6	1.24521
Figure 2E
Wistar Rat Heart (mol/G wet weight)
glycogen*	1.16e-07	2.58e-07	2.59e-08	2.83e-08	1.84e-08
G1P	2.77e-08	1.06e-08	8.83e-09
a-glucose	1.53e-06	4.66e-08	5.22e-07	2.65e-07	7.53e-07
	C57BL6 Liver	(mol/G wet weight)
	1	2	5	4	5
glycogen*	9.87403e-08	5.10508e-07	4.82312e-07	1.48656e-07
	NMR Liver	(mol/G wet weight)
glycogen*	8.3154e-06	3.75812e-06	3.28967e-06	3.71244e-06	1.59324e-06
